# Supplementary material
Source: publisher figshare collection journal article supplement (https://geolsoc.figshare.com/ndownloader/files/8777140)
Supplement: Supplementary file 1 [file 8777140]

## Sheet: U-Pd data
SUPPLEMENTARY TABLE - U-Th-Pb SIMS data
Sample	Concentration (ppm)				f2062	Total (uncorrected) ratio ± 1s			Radiogenic (corrected) ± 1s3			Age4		Disc6
Spot ID	U	Th	Pb1	Th/U	(%)	206Pb/238U	207Pb/206Pb		206Pb/238U	207Pb/206Pb		206Pb/238U	207-corr5	(%)
Loc. 1, VP05-025a, Chaplino complex volcanoclastic
n2382-1	77	42	nd	0.55	3.06	0.01340 ± 0.00022	0.0469 ± 0.0024		0.01299 ± 0.00023	nd		83.2 ± 1.5	85.9 ± 1.4	nd
n2382-2	310	110	4.1788	0.36	0.39	0.01348 ± 0.00018	0.0442 ± 0.0012		0.01348 ± 0.00018	0.0442 ± 0.0012		86.3 ± 1.1	86.7 ± 1.2	188.709
n2382-3 *	650	540	10.595	0.84	0.24	0.01630 ± 0.00021	0.04779 ± 0.00080		0.01630 ± 0.00021	0.04779 ± 0.00080		104 ± 1	104 ± 1	17.2089
n2382-4	770	330	10.472	0.43	0.11	0.01360 ± 0.00017	0.04853 ± 0.00076		0.01360 ± 0.00017	0.04853 ± 0.00076		87.1 ± 1.1	87.0 ± 1.1	-30.5598
n2382-5	220	190	2.8336	0.85	1.01	0.01301 ± 0.00019	0.0511 ± 0.0016		0.01288 ± 0.00019	0.0431 ± 0.0025		82.5 ± 1.2	83.0 ± 1.2	152.402
n2382-6 *	390	240	6.3648	0.61	0.1	0.01632 ± 0.00021	0.04900 ± 0.0010		0.01632 ± 0.00021	0.04900 ± 0.0010		104.0 ± 1.0	104.0 ± 1.0	-29.4297
n2382-7	1500	1500	20.46	0.96	0.73	0.01374 ± 0.00018	0.05081 ± 0.00065		0.01364 ± 0.00017	0.04503 ± 0.00091		87.4 ± 1.1	87.6 ± 1.1	263.628
n2382-8	140	52	1.8578	0.37	0.19	0.01327 ± 0.00019	0.0510 ± 0.0021		0.01327 ± 0.00019	0.0510 ± 0.0021		85.0 ± 1.2	84.7 ± 1.2	-65.1119
n2382-9	270	150	3.6828	0.55	0.86	0.01376 ± 0.00020	0.0479 ± 0.0013		0.01364 ± 0.00020	0.0411 ± 0.0021		87.3 ± 1.2	88.1 ± 1.3	131.761
n2382-10	150	96	1.9965	0.65	1.29	0.01348 ± 0.00019	0.0425 ± 0.0016		0.01331 ± 0.00019	0.0322 ± 0.0032		85.2 ± 1.2	86.9 ± 1.2	109.751
Loc. 2, VP05-020, Chaplino complex (tuff)
n2383-1	150	60	2.0175	0.39	0.96	0.01345 ± 0.00017	0.0479 ± 0.0017		0.01345 ± 0.00017	0.0479 ± 0.0017		86.1 ± 1.1	86.1 ± 1.1	-8.53637
n2383-2	240	93	3.1536	0.39	0.64	0.01314 ± 0.00018	0.0480 ± 0.0014		0.01314 ± 0.00018	0.0480 ± 0.0014		84.1 ± 1.1	84.1 ± 1.1	-14.1945
n2383-3	490	360	6.615	0.73	0.15	0.01350 ± 0.00016	0.04757 ± 0.00093		0.01350 ± 0.00016	0.04757 ± 0.00093		86.5 ± 1.0	86.5 ± 1.0	11.044
n2383-4	240	93	3.2136	0.39	0.62	0.01339 ± 0.00018	0.0468 ± 0.0016		0.01339 ± 0.00018	0.0468 ± 0.0016		85.8 ± 1.1	85.9 ± 1.1	115.542
n2383-5	210	78	2.7762	0.37	0.75	0.01322 ± 0.00017	0.0478 ± 0.0014		0.01322 ± 0.00017	0.0478 ± 0.0014		84.6 ± 1.1	84.6 ± 1.1	-4.69914
n2383-6	170	62	2.2899	0.36	0.44	0.01347 ± 0.00018	0.0457 ± 0.0017		0.01347 ± 0.00018	0.0457 ± 0.0017		86.3 ± 1.2	86.5 ± 1.2	638.608
n2383-7	390	210	5.187	0.54	0.46	0.01336 ± 0.00019	0.0503 ± 0.0011		0.01330 ± 0.00019	0.0467 ± 0.0014		85.2 ± 1.2	85.3 ± 1.2	168.868
n2383-8	290	120	3.7526	0.42	1.06	0.01308 ± 0.00016	0.0569 ± 0.0016		0.01294 ± 0.00016	0.0485 ± 0.0024		82.9 ± 1.0	82.8 ± 1.0	-34.0376
n2383-9	160	78	2.1664	0.49	0.81	0.01354 ± 0.00016	0.0467 ± 0.0016		0.01354 ± 0.00016	0.0467 ± 0.0016		86.7 ± 1.0	86.8 ± 1.1	142.27
n2383-10	240	99	3.1296	0.41	0.87	0.01315 ± 0.00016	0.0451 ± 0.0013		0.01304 ± 0.00016	0.0382 ± 0.0023		83.5 ± 1.0	84.5 ± 1.1	118.381
Loc. 3, VP05-017c, Valley pluton granitoid
n2389-1	2700	2100	57.321	0.78	0.79	0.02140 ± 0.00026	0.0547 ± 0.0014		0.02123 ± 0.00026	0.0485 ± 0.0021		135 ± 2	135 ± 2	8.46013
n2389-2 *	350	240	7.1365	0.68	0.32	0.02045 ± 0.00026	0.0489 ± 0.0010		0.02039 ± 0.00026	0.0464 ± 0.0013		130 ± 2	130 ± 2	609.317
n2389-3	2300	1500	49.404	0.67	0.35	0.02155 ± 0.00026	0.05095 ± 0.00039		0.02148 ± 0.00026	0.04816 ± 0.00050		137 ± 2	137 ± 2	27.889
n2389-4	2300	1100	48.622	0.48	0.07	0.02116 ± 0.00026	0.04858 ± 0.00052		0.02114 ± 0.00026	0.04804 ± 0.00054		135 ± 2	135 ± 2	33.8634
n2389-5	4800	3400	104.496	0.7	0.89	0.02196 ± 0.00026	0.05519 ± 0.00028		0.02177 ± 0.00026	0.04818 ± 0.00045		139 ± 2	139 ± 2	28.9213
n2389-6	1000	400	21.06	0.39	0.12	0.02109 ± 0.00027	0.04890 ± 0.00065		0.02106 ± 0.00027	0.04793 ± 0.00074		134 ± 2	135 ± 2	40.6523
n2389-7 *	150	75	3.006	0.51	0.5	0.02014 ± 0.00027	0.0489 ± 0.0015		0.02004 ± 0.00027	0.0450 ± 0.0022		128 ± 2	128 ± 2	323.489
n2389-8	1000	470	21.06	0.45	0.08	0.02107 ± 0.00026	0.04901 ± 0.00069		0.02106 ± 0.00026	0.04840 ± 0.00072		134 ± 2	134 ± 2	13.0356
n2389-9c	700	680	14.637	0.96	0.12	0.02094 ± 0.00026	0.04824 ± 0.00069		0.02091 ± 0.00026	0.04730 ± 0.00078		133 ± 2	134 ± 2	172.038
n2389-10c	860	890	18.1804	1	0.1	0.02116 ± 0.00026	0.04777 ± 0.00061		0.02114 ± 0.00026	0.04701 ± 0.00067		135 ± 2	135 ± 2	108.217
Loc. 3, VP05-018, Valley pluton granitoid
n2461-1	700	430	14.476	0.61	0.12	0.02071 ± 0.00026	0.04836 ± 0.00071		0.02068 ± 0.00026	0.04742 ± 0.00080		132 ± 2	132 ± 2	87.6703
n2461-2	760	620	15.5192	0.82	0.19	0.02046 ± 0.00025	0.04943 ± 0.00068		0.02042 ± 0.00025	0.04795 ± 0.00081		130 ± 2	130 ± 2	35.2372
n2461-3r	650	530	13.182	0.83	0.15	0.02031 ± 0.00025	0.04887 ± 0.00074		0.02028 ± 0.00025	0.04770 ± 0.00086		129 ± 2	130 ± 2	53.9498
n2461-3c	610	550	12.3525	0.9	0.07	0.02025 ± 0.00025	0.04839 ± 0.00075		0.02025 ± 0.00025	0.04839 ± 0.00075		129 ± 2	129 ± 2	9.30583
n2461-4r	710	480	14.91	0.67	0.11	0.02102 ± 0.00026	0.05015 ± 0.00070		0.02100 ± 0.00026	0.04929 ± 0.00077		134 ± 2	134 ± 2	-17.4022
n2461-4c	590	580	12.1245	0.98	0.24	0.02060 ± 0.00025	0.04891 ± 0.00076		0.02055 ± 0.00025	0.04703 ± 0.00091		131 ± 2	131 ± 2	159.165
n2461-5	610	320	12.6453	0.52	0.21	0.02078 ± 0.00026	0.04766 ± 0.00074		0.02073 ± 0.00026	0.04596 ± 0.00092		132 ± 2	133 ± 2	3036.52
n2461-6	660	480	13.6554	0.73	0.1	0.02071 ± 0.00025	0.04828 ± 0.00072		0.02069 ± 0.00025	0.04746 ± 0.00077		132 ± 2	132 ± 2	83.2602
n2461-7	810	580	16.6941	0.72	0.15	0.02064 ± 0.00025	0.04958 ± 0.00077		0.02061 ± 0.00025	0.04843 ± 0.00086		132 ± 2	132 ± 2	9.28595
n2461-8	690	480	13.8207	0.7	0.27	0.02008 ± 0.00024	0.04931 ± 0.00087		0.02003 ± 0.00024	0.0471 ± 0.0011		128 ± 2	128 ± 2	126.447
Loc. 4, P95-G-205, Chaplino complex Ignibrite (cognate inclusion)
G205-1	449.136	198.732	5.26	0.457196	--	0.01362 ± 0.00018	0.0473 ± 0.0018		0.01353 ± 0.00018	0.0415 ± 0.0031		86.6 ± 1.2	87.3 ± 1.1	-393.394
G205-2	412.117	182.547	4.85	0.457685	--	0.01370 ± 0.00018	0.0435 ± 0.0017		0.01366 ± 0.00018	0.0415 ± 0.0022		87.5 ± 1.1	88.2 ± 1.2	-396.218
G205-3	941.357	450.064	14.1	0.494006	--	0.01748 ± 0.00019	0.0481 ± 0.0011		0.01744 ± 0.00019	0.0461 ± 0.0014		112 ± 1.2	112 ± 1.2	-95.637
G205-4	220.814	238.522	2.65	1.11613	0.124101	0.01397 ± 0.00024	0.0488 ± 0.0026		0.01384 ± 0.00024	0.0417 ± 0.0046		88.6 ± 1.5	89.3 ± 1.5	-379.033
G205-5	680.992	343.511	8.55	0.521208	0.0756805	0.01462 ± 0.00018	0.0485 ± 0.0014		0.01455 ± 0.00017	0.0446 ± 0.0022		93.1 ± 1.1	93.5 ± 1.1	-180.863
G205-6	106.329	63.2452	1.31	0.614596	--	0.01433 ± 0.00032	0.0447 ± 0.0035		0.01466 ± 0.00038	0.0630 ± 0.012		93.8 ± 2.4	92.1 ± 2.0	640.716
G205-7	588.101	298.269	6.89	0.524045	--	0.01364 ± 0.00016	0.0460 ± 0.0015		0.01364 ± 0.00016	0.0460 ± 0.0015		87.3 ± 1.0	87.5 ± 1.1	-103.722
G205-8	899.88	541.916	10.7	0.622242	0.233751	0.01386 ± 0.00015	0.0496 ± 0.0013		0.01380 ± 0.00015	0.0458 ± 0.0021		88.3 ± 1.0	88.6 ± 0.99	-116.274
G205-9c	2007.38	1854.19	22.1	0.954411	0.0956713	0.01282 ± 0.00013	0.0484 ± 0.0009		0.01280 ± 0.00013	0.0475 ± 0.0011		82.0 ± 0.82	82.0 ± 0.83	-10.8329
G205-10	457.51	247.046	5.17	0.557943	0.630858	0.01316 ± 0.00017	0.0527 ± 0.0019		0.01305 ± 0.00018	0.0464 ± 0.0032		83.6 ± 1.1	83.7 ± 1.1	-80.7268
Loc. 5, VP05-007a, Tkachen Bay pluton
n2392-1c *	494	330	9.19828	0.67	1.63	0.01893 ± 0.00024	0.05581 ± 0.00098		0.01862 ± 0.00024	0.0429 ± 0.0020		119 ± 1	120 ± 2	169.778
n2392-1r	218	110	4.0548	0.49	0.44	0.01868 ± 0.00025	0.0467 ± 0.0013		0.01860 ± 0.00025	0.0432 ± 0.0018		119 ± 2	120 ± 2	178.91
n2392-2c	216	150	4.00464	0.7	0.39	0.01861 ± 0.00024	0.0501 ± 0.0014		0.01854 ± 0.00024	0.0470 ± 0.0017		118 ± 2	119 ± 2	140.642
n2392-2r	203	120	3.74535	0.57	0.44	0.01853 ± 0.00025	0.0484 ± 0.0014		0.01845 ± 0.00025	0.0449 ± 0.0020		118 ± 2	118 ± 2	301.249
n2392-3c	290	130	5.539	0.47	0.16	0.01910 ± 0.00025	0.0486 ± 0.0012		0.01910 ± 0.00025	0.0486 ± 0.0012		122 ± 2	122 ± 2	-3.85072
n2392-3r *	116	45	2.059	0.39	1.23	0.01797 ± 0.00030	0.0482 ± 0.0024		0.01775 ± 0.00030	0.0384 ± 0.0041		113 ± 2	115 ± 2	125.793
n2392-4	206	120	3.8522	0.59	0.56	0.01881 ± 0.00025	0.0479 ± 0.0014		0.01870 ± 0.00025	0.0435 ± 0.0021		119 ± 2	120 ± 2	187.564
n2392-5c	92.2	52	1.68173	0.57	0.34	0.01824 ± 0.00028	0.0488 ± 0.0021		0.01824 ± 0.00028	0.0488 ± 0.0021		117 ± 2	116 ± 2	-15.2747
n2392-5r	200	87	3.764	0.44	0.42	0.01890 ± 0.00024	0.0512 ± 0.0015		0.01882 ± 0.00024	0.0479 ± 0.0020		120 ± 2	120 ± 2	30.0836
Loc. 6, VP05-004, Tkachen Bay pluton
n2388-1c *	190	63	3.4504	0.33	20.3	0.02279 ± 0.00086	0.209 ± 0.024		0.01816 ± 0.00094	0.049 ± 0.044		116 ± 6	116 ± 7	-27.9481
n2388-2c	180	97	3.3552	0.53	0.46	0.01864 ± 0.00028	0.0509 ± 0.0018		0.01864 ± 0.00028	0.0509 ± 0.0018		119 ± 2	119 ± 2	-50.2252
n2388-3c	200	110	3.716	0.57	0	0.01858 ± 0.00030	0.0506 ± 0.0015		0.01858 ± 0.00030	0.0506 ± 0.0015		119 ± 2	118 ± 2	-47.6061
n2388-3r *	110	51	2.0416	0.45	1.86	0.01891 ± 0.00036	0.0474 ± 0.0020		0.01856 ± 0.00036	0.0325 ± 0.0046		119 ± 2	121 ± 2	113.926
n2388-4	220	120	4.1866	0.53	0.22	0.01903 ± 0.00028	0.0497 ± 0.0017		0.01903 ± 0.00028	0.0497 ± 0.0017		122 ± 2	121 ± 2	-32.8308
n2388-5	290	120	5.4607	0.42	0.43	0.01883 ± 0.00031	0.0517 ± 0.0015		0.01883 ± 0.00031	0.0517 ± 0.0015		120 ± 2	120 ± 2	-56.1857
n2388-6	140	70	2.6894	0.5	0.37	0.01921 ± 0.00032	0.0456 ± 0.0017		0.01921 ± 0.00032	0.0456 ± 0.0017		123 ± 2	123 ± 2	627.923
n2388-7	150	79	2.838	0.52	0.1	0.01892 ± 0.00029	0.0475 ± 0.0018		0.01892 ± 0.00029	0.0475 ± 0.0018		121 ± 2	121 ± 2	66.7737
n2388-8	110	57	2.1274	0.51	0.55	0.01934 ± 0.00029	0.0482 ± 0.0021		0.01934 ± 0.00029	0.0482 ± 0.0021		123 ± 2	124 ± 2	14.0112
n2388-9	120	69	2.3484	0.56	0.51	0.01957 ± 0.00030	0.0496 ± 0.0022		0.01957 ± 0.00030	0.0496 ± 0.0022		125 ± 2	125 ± 2	-28.9064
n2388-10r	190	97	3.6328	0.52	0.32	0.01912 ± 0.00031	0.0483 ± 0.0016		0.01912 ± 0.00031	0.0483 ± 0.0016		122 ± 2	122 ± 2	6.81108
n2388-10c *	290	220	6.0813	0.76	0.51	0.02107 ± 0.00033	0.0472 ± 0.0015		0.02097 ± 0.00033	0.0432 ± 0.0018		134 ± 2	135 ± 2	187.676
Loc. 7, VP05-006, Rumilet Bay pluton (microgranite dike)
n2463-1	250	210	3.33	0.81	0.44	0.01332 ± 0.00020	0.0477 ± 0.0012		0.01332 ± 0.00020	0.0477 ± 0.0012		85.3 ± 1.3	85.3 ± 1.3	0.359652
n2463-2	280	250	3.6512	0.88	0.48	0.01310 ± 0.00019	0.0473 ± 0.0012		0.01304 ± 0.00019	0.0435 ± 0.0016		83.5 ± 1.2	83.9 ± 1.2	160.804
n2463-3	470	430	6.1617	0.92	0.12	0.01311 ± 0.00015	0.04669 ± 0.00084		0.01311 ± 0.00015	0.04669 ± 0.00084		83.9 ± 1.0	84.0 ± 1.0	151.125
n2463-4 *	370	390	4.921	1.1	1.78	0.01354 ± 0.00018	0.0578 ± 0.0023		0.01330 ± 0.00018	0.0437 ± 0.0034		85.2 ± 1.1	85.6 ± 1.2	167.975
n2463-5	310	270	4.2315	0.87	0.23	0.01365 ± 0.00016	0.0468 ± 0.0010		0.01365 ± 0.00016	0.0468 ± 0.0010		87.4 ± 1.0	87.5 ± 1.0	112.079
n2463-6	400	420	5.224	1.1	0.08	0.01306 ± 0.00016	0.04666 ± 0.00093		0.01306 ± 0.00016	0.04666 ± 0.00093		83.7 ± 1.0	83.8 ± 1.0	161.662
n2463-7	360	350	4.8672	0.96	0.23	0.01352 ± 0.00018	0.04688 ± 0.00098		0.01352 ± 0.00018	0.04688 ± 0.00098		86.6 ± 1.2	86.7 ± 1.2	100.89
n2463-8	230	170	3.0061	0.75	0.39	0.01307 ± 0.00016	0.0476 ± 0.0013		0.01307 ± 0.00016	0.0476 ± 0.0013		83.7 ± 1.0	83.7 ± 1.0	8.81444
n2463-9	230	200	3.0406	0.86	0.4	0.01322 ± 0.00016	0.0486 ± 0.0013		0.01322 ± 0.00016	0.0486 ± 0.0013		84.7 ± 1.0	84.6 ± 1.1	-33.7651
Loc. 8, VP05-013a, Valley pluton granitoid
n2393-1	990	340	20.9286	0.34	0.15	0.02117 ± 0.00016	0.04951 ± 0.00039		0.02114 ± 0.00016	0.04832 ± 0.00045		135 ± 1	135 ± 1	17.4173
n2393-2	1700	580	36.465	0.34	0.07	0.02147 ± 0.00017	0.04845 ± 0.00029		0.02145 ± 0.00017	0.04793 ± 0.00030		137 ± 1	137 ± 1	43.1947
n2393-3	1600	810	33.856	0.49	0.14	0.02119 ± 0.00017	0.05041 ± 0.00051		0.02116 ± 0.00017	0.04930 ± 0.00059		135 ± 1	135 ± 1	-16.8847
n2393-4	1300	550	28.002	0.42	0.04	0.02155 ± 0.00017	0.04959 ± 0.00034		0.02154 ± 0.00017	0.04932 ± 0.00035		137 ± 1	137 ± 1	-15.8626
n2393-5 *	1400	390	29.274	0.28	12.46	0.02389 ± 0.00075	0.165 ± 0.027		0.02091 ± 0.00087	0.0690 ± 0.039		133 ± 5	130 ± 7	-86.0384
n2393-6	1200	430	25.74	0.37	0.03	0.02145 ± 0.00017	0.04935 ± 0.00035		0.02145 ± 0.00017	0.04935 ± 0.00035		137 ± 1	137 ± 1	-17.0664
n2393-7	2300	1100	49.312	0.46	0.05	0.02145 ± 0.00016	0.04868 ± 0.00025		0.02144 ± 0.00016	0.04832 ± 0.00026		137 ± 1	137 ± 1	19.1016
n2393-8	1500	480	32.01	0.32	0.04	0.02135 ± 0.00026	0.04926 ± 0.00031		0.02134 ± 0.00026	0.04895 ± 0.00032		136 ± 2	136 ± 2	-6.43944
n2393-9	1900	910	40.717	0.49	0.1	0.02146 ± 0.00016	0.04874 ± 0.00029		0.02143 ± 0.00016	0.04792 ± 0.00032		137 ± 1	137 ± 1	43.8104
n2393-10c	1000	630	21.46	0.63	0.04	0.02146 ± 0.00021	0.04789 ± 0.00039		0.02146 ± 0.00021	0.04789 ± 0.00039		137 ± 1	137 ± 1	46.596
n2393-10r	2100	1000	45.045	0.5	0.03	0.02145 ± 0.00018	0.04870 ± 0.00027		0.02145 ± 0.00018	0.04844 ± 0.00028		137 ± 1	137 ± 1	13.4365
Loc. 8, VP05-013b, Mt. Chaos complex (tuff)
n2386-1 *	290	140	4.6864	0.48	0.35	0.01622 ± 0.00014	0.04810 ± 0.0011		0.01616 ± 0.00014	0.04530 ± 0.0013		103 ± 1	104 ± 1	377.84
n2386-2	420	190	6.8376	0.46	0	0.01628 ± 0.00014	0.04864 ± 0.00089		0.01628 ± 0.00014	0.04864 ± 0.00089		104 ± 1	104 ± 1	-20.541
n2386-3 *	410	280	6.5723	0.68	0.85	0.01616 ± 0.00017	0.05580 ± 0.0020		0.01603 ± 0.00018	0.04910 ± 0.0026		102 ± 1	102 ± 1	-33.9411
n2386-4 *	380	150	6.0762	0.4	0.44	0.01606 ± 0.00013	0.04835 ± 0.00092		0.01599 ± 0.00013	0.04490 ± 0.0013		102 ± 1	103 ± 1	262.468
n2386-5	530	220	8.7344	0.42	0.12	0.01650 ± 0.00013	0.04890 ± 0.00077		0.01648 ± 0.00013	0.04799 ± 0.00088		105 ± 1	105 ± 1	6.91645
n2386-6	570	270	9.4449	0.48	0.17	0.01659 ± 0.00014	0.04864 ± 0.00081		0.01657 ± 0.00014	0.04729 ± 0.00092		106 ± 1	106 ± 1	66.0016
n2386-7	470	230	7.7597	0.48	0.21	0.01655 ± 0.00014	0.04776 ± 0.00079		0.01651 ± 0.00014	0.04613 ± 0.00095		106 ± 1	106 ± 1	875
n2386-8	340	140	5.5658	0.41	0.24	0.01641 ± 0.00017	0.04800 ± 0.0012		0.01637 ± 0.00017	0.04610 ± 0.0013		105 ± 1	105 ± 1	497
n2386-9	100	45	1.672	0.43	0.88	0.01687 ± 0.00015	0.04690 ± 0.0019		0.01672 ± 0.00015	0.03990 ± 0.0029		107 ± 1	108 ± 1	131.086
n2386-10	610	260	9.9918	0.42	0.08	0.01638 ± 0.00013	0.04699 ± 0.00071		0.01638 ± 0.00013	0.04699 ± 0.00071		105 ± 1	105 ± 1	115.75
Loc. 9, ELM NC28.7a, Tkachen Bay pluton granite
n5125-1	52.8176	20.5806	1.13173	0.389654	0	0.01833 ± 0.00025	0.04525 ± 0.0019		0.01833 ± 0.00025	0.04525 ± 0.0019		117 ± 2	118 ± 2	380.111
n5125-2	122.509	70.8644	2.82268	0.57844	0.09	0.01854 ± 0.00023	0.04886 ± 0.0013		0.01854 ± 0.00023	0.04886 ± 0.0013		118 ± 1	118 ± 1	-16.1445
n5125-3	116.449	65.6521	2.6475	0.563782	0.16	0.01852 ± 0.00022	0.05087 ± 0.0017		0.01852 ± 0.00022	0.05087 ± 0.0017		118 ± 1	118 ± 1	-50.0998
n5125-4r	169.727	71.6841	3.7853	0.422351	0	0.0188 ± 0.00021	0.04736 ± 0.0011		0.01880 ± 0.00021	0.04736 ± 0.0011		120 ± 1	120 ± 1	78.8364
n5125-4c	187.969	91.5812	4.30213	0.487214	0.1	0.01899 ± 0.00020	0.04723 ± 0.0011		0.01899 ± 0.00019	0.04723 ± 0.0011		121 ± 1	121 ± 1	100.094
n5125-5	153.207	78.5541	3.4774	0.512731	0.12	0.01868 ± 0.00024	0.04909± 0.0014		0.01868 ± 0.00024	0.04909 ± 0.0014		119 ± 2	119 ± 2	-21.8179
n5125-7	92.5723	54.9341	2.1326	0.593418	0	0.01859 ± 0.00022	0.05148 ± 0.0024		0.01859 ± 0.00022	0.05148 ± 0.0024		119 ± 1	118 ± 1	-55.2526
n5125-8	146.982	68.5861	3.33835	0.466631	0.07	0.01891 ± 0.00021	0.04853 ± 0.0012		0.01891 ± 0.00021	0.04853 ± 0.0012		121 ± 1	121 ± 1	-3.48106
n5125-9	196.193	98.7456	4.52032	0.503309	0	0.01906 ± 0.00021	0.05007 ± 0.0011		0.01906 ± 0.00021	0.05007 ± 0.0011		122 ± 1	121 ± 1	-38.9337
n5125-10	219.833	110.307	5.03327	0.501778	0	0.01897 ± 0.00019	0.04968 ± 0.0012		0.01897 ± 0.00019	0.04968 ± 0.0012		121 ± 1	121 ± 1	-33.0632
n5125-11	141.333	65.3121	3.17182	0.462115	0	0.01865 ± 0.00019	0.04929 ± 0.0013		0.01865 ± 0.00019	0.04929 ± 0.0013		119 ± 1	119 ± 1	-26.6356
n5125-12	143.001	73.9796	3.27163	0.517336	0.09	0.01857 ± 0.00021	0.05120 ± 0.0013		0.01857 ± 0.00021	0.05120 ± 0.0013		119 ± 1	118 ± 1	-52.9787
n5125-13	146.182	71.0438	3.27514	0.485996	0.13	0.01866 ± 0.00022	0.04824 ± 0.0012		0.01866 ± 0.00022	0.04824 ± 0.0012		119 ± 1	119 ± 1	7.61531
n5125-14	104.103	47.1917	2.31714	0.453319	0.16	0.01861 ± 0.00021	0.04906 ± 0.0014		0.01861 ± 0.00021	0.04906 ± 0.0014		119 ± 1	119 ± 1	-21.385
n5125-15	150.158	83.1685	3.38187	0.553873	0.17	0.01837 ± 0.00019	0.04880 ± 0.0012		0.01837 ± 0.00019	0.04880 ± 0.0012		117 ± 1	117 ± 1	-15.1838
n5125-16	130.659	76.4386	2.98325	0.585022	0	0.01860 ± 0.00020	0.05151 ± 0.0013		0.01860 ± 0.00020	0.05151 ± 0.0013		119 ± 1	118 ± 1	-55.4571
n5125-17	143.448	83.5393	3.25539	0.582366	0.01	0.01849 ± 0.00035	0.04493 ± 0.0014		0.01849 ± 0.00035	0.04493 ± 0.0014		118 ± 2	119 ± 2	301.116
n5125-18c*	540.06	576.263	15.3194	1.06704	0	0.02053 ± 0.00024	0.04919 ± 0.0006		0.02053 ± 0.00024	0.04919 ± 0.00057		131 ± 2	131 ± 2	-16.6364
n5125-19	82.8308	42.0418	1.88452	0.507562	0.19	0.01887 ± 0.00023	0.04676 ± 0.0017		0.01887 ± 0.00023	0.04676 ± 0.0017		120 ± 1	121 ± 1	229.259
n5125-20	89.079	43.699	1.97002	0.490564	0.1	0.01840 ± 0.00023	0.04822 ± 0.0016		0.01840 ± 0.00023	0.04822 ± 0.0015		118 ± 1	118 ± 1	6.83497
n5125-21	163.346	91.6134	3.77567	0.560856	0	0.01883 ± 0.00022	0.04542 ± 0.0011		0.01883 ± 0.00022	0.04542 ± 0.0010		120 ± 1	121 ± 1	467.151
n5125-22	122.375	70.4518	2.85401	0.575706	0.08	0.01886 ± 0.00025	0.04857 ± 0.0013		0.01886 ± 0.00025	0.04857 ± 0.0013		120 ± 2	120 ± 2	-5.24931
n5125-23	204.814	115.192	4.75523	0.562424	0.07	0.01884 ± 0.00019	0.04912 ± 0.00099		0.01884 ± 0.00019	0.04920 ± 0.0010		120 ± 1	120 ± 1	-23.6742
Loc. 10, VP05-016b, Mt. Chaos complex (granite clast)
n2385-1	160	100	3.0672	0.64	0.18	0.01917 ± 0.00028	0.0483 ± 0.0017		0.01917 ± 0.00028	0.0483 ± 0.0017		122 ± 2	122 ± 2	5.46998
n2385-2	220	160	4.3956	0.73	0.33	0.01998 ± 0.00029	0.0470 ± 0.0014		0.01998 ± 0.00029	0.0470 ± 0.0014		128 ± 2	128 ± 2	152.947
n2385-3	180	120	3.4362	0.67	0.19	0.01909 ± 0.00025	0.0500 ± 0.0017		0.01909 ± 0.00025	0.0500 ± 0.0017		122 ± 2	122 ± 2	-38.1349
n2385-4	130	89	2.4882	0.7	0.59	0.01914 ± 0.00027	0.0529 ± 0.0023		0.01914 ± 0.00027	0.0529 ± 0.0023		122 ± 2	122 ± 2	-62.8466
n2385-5	240	210	4.6608	0.85	0.56	0.01953 ± 0.00025	0.0481 ± 0.0014		0.01942 ± 0.00025	0.0437 ± 0.0019		124 ± 2	125 ± 2	198.415
n2385-6	210	130	3.9627	0.6	0.39	0.01887 ± 0.00024	0.0482 ± 0.0015		0.01887 ± 0.00024	0.0482 ± 0.0015		120 ± 2	121 ± 2	11.7859
n2385-7	220	130	4.301	0.62	0.35	0.01955 ± 0.00026	0.0478 ± 0.0014		0.01955 ± 0.00026	0.0478 ± 0.0014		125 ± 2	125 ± 2	39.6302
n2385-8	360	260	7.0128	0.72	0.2	0.01948 ± 0.00026	0.0485 ± 0.0011		0.01948 ± 0.00026	0.0485 ± 0.0011		124 ± 2	124 ± 2	-1.23256
n2385-9	290	250	5.887	0.85	0.24	0.02030 ± 0.00025	0.0486 ± 0.0012		0.02030 ± 0.00025	0.0486 ± 0.0012		130 ± 2	130 ± 2	0.81386
n2385-10r	150	82	2.9145	0.56	0.18	0.01943 ± 0.00027	0.0487 ± 0.0017		0.01943 ± 0.00027	0.0487 ± 0.0017		124 ± 2	124 ± 2	-5.72903
n2385-10c	460	260	8.8596	0.57	0.18	0.01926 ± 0.00023	0.0493 ± 0.0010		0.01926 ± 0.00023	0.0493 ± 0.0010		123 ± 1	123 ± 1	-23.4003
Loc. 10, VP05-016c, Mt. Chaos complex (granite clast)
n2384-1	330	290	6.4515	0.86	0.19	0.01955 ± 0.00023	0.04739 ± 0.00093		0.01955 ± 0.00023	0.04739 ± 0.00093		125 ± 1	125 ± 1	81.5448
n2384-2	250	130	4.8025	0.54	0.36	0.01921 ± 0.00023	0.0503 ± 0.0011		0.01921 ± 0.00023	0.0503 ± 0.0011		123 ± 1	122 ± 1	-41.3725
n2384-3	200	160	3.86	0.78	0.52	0.01930 ± 0.00024	0.0482 ± 0.0012		0.01930 ± 0.00024	0.0482 ± 0.0012		123 ± 2	123 ± 2	13.606
n2384-4 *	170	97	3.3422	0.56	0.31	0.01966 ± 0.00025	0.0458 ± 0.0013		0.01966 ± 0.00025	0.0458 ± 0.0013		126 ± 2	126 ± 2	1091.42
n2384-5	230	140	4.4091	0.58	0.34	0.01917 ± 0.00024	0.0503 ± 0.0012		0.01917 ± 0.00024	0.0503 ± 0.0012		122 ± 1	122 ± 2	-42.3906
n2384-6	390	320	7.605	0.83	0.04	0.01950 ± 0.00023	0.05045 ± 0.00090		0.01950 ± 0.00023	0.05045 ± 0.00090		124 ± 1	124 ± 1	-42.7741
n2384-7	200	120	3.78	0.58	0.22	0.01890 ± 0.00026	0.0492 ± 0.0013		0.01890 ± 0.00026	0.0492 ± 0.0013		121 ± 2	121 ± 2	-24.3056
n2384-8	260	120	4.9608	0.45	0.68	0.01921 ± 0.00023	0.0497 ± 0.0016		0.01908 ± 0.00023	0.0443 ± 0.0022		122 ± 1	122 ± 1	231.666
n2384-9r *	180	95	3.3318	0.53	0.5	0.01851 ± 0.00024	0.0500 ± 0.0016		0.01851 ± 0.00024	0.0500 ± 0.0016		118 ± 2	118 ± 2	-40.1031
n2384-9c	330	270	6.3162	0.8	0.3	0.01914 ± 0.00023	0.0505 ± 0.0012		0.01914 ± 0.00023	0.0505 ± 0.0012		122 ± 1	122 ± 1	-44.0301
n2384-10	280	140	5.2948	0.52	0.41	0.01899 ± 0.00023	0.0471 ± 0.0012		0.01891 ± 0.00023	0.0439 ± 0.0017		121 ± 1	121 ± 1	203.644
Loc. 11, VP05-030, Rumilet Bay pluton
n2391-1	200	88	2.592	0.45	0.96	0.01309 ± 0.00018	0.0461 ± 0.0016		0.01296 ± 0.00018	0.0384 ± 0.0029		83.0 ± 1.2	84.0 ± 1.2	118.985
n2391-2	160	110	2.128	0.73	0.29	0.01330 ± 0.00023	0.0475 ± 0.0018		0.01330 ± 0.00023	0.0475 ± 0.0018		85.2 ± 1.5	85.2 ± 1.5	15.4923
n2391-3	71	50	0.89318	0.71	1.57	0.01278 ± 0.00022	0.0466 ± 0.0027		0.01258 ± 0.00022	0.0340 ± 0.0051		80.6 ± 1.4	82.0 ± 1.4	110.925
n2391-4	97	63	1.22414	0.65	3.1	0.01303 ± 0.00024	0.0546 ± 0.0036		0.01262 ± 0.00024	0.0296 ± 0.0073		80.9 ± 1.5	82.7 ± 1.5	107.445
n2391-5 *	250	120	3.1875	0.48	0.13	0.01275 ± 0.00017	0.0492 ± 0.0016		0.01275 ± 0.00017	0.0492 ± 0.0016		81.7 ± 1.1	81.5 ± 1.1	-47.8583
n2391-6	460	470	6.1732	1	0.19	0.01342 ± 0.00016	0.0480 ± 0.0013		0.01342 ± 0.00016	0.0480 ± 0.0013		85.9 ± 1.0	85.9 ± 1.0	-13.9146
n2391-7	370	310	5.0135	0.85	0.45	0.01361 ± 0.00018	0.0465 ± 0.0012		0.01355 ± 0.00018	0.0429 ± 0.0017		86.7 ± 1.1	87.3 ± 1.2	151.082
n2391-8	230	170	2.9624	0.73	0.53	0.01295 ± 0.00021	0.0483 ± 0.0016		0.01288 ± 0.00021	0.0441 ± 0.0023		82.5 ± 1.3	82.9 ± 1.3	179.458
Loc. 12, VP05-031a, Rumilet Bay pluton
n2462-1	44	28	nd	0.63	4.63	0.01281 ± 0.00018	0.0484 ± 0.0027		0.01222 ± 0.00021	nd		78.3 ± 1.3	82.0 ± 1.2	nd
n2462-2	47	29	nd	0.62	3.52	0.01309 ± 0.00018	0.0467 ± 0.0025		0.01263 ± 0.00020	nd		80.9 ± 1.3	84.0 ± 1.2	nd
n2462-3	340	290	4.5322	0.86	0.37	0.01338 ± 0.00010	0.0475 ± 0.0011		0.01333 ± 0.00010	0.0446 ± 0.0013		85.3 ± 0.7	85.7 ± 0.7	209.171
n2462-4	530	640	7.0331	1.2	0.26	0.01331 ± 0.00011	0.04834 ± 0.00073		0.01327 ± 0.00011	0.04630 ± 0.00090		85.0 ± 0.7	85.2 ± 0.7	1576
n2462-5	190	80	2.4149	0.41	2.41	0.01302 ± 0.00013	0.0472 ± 0.0012		0.01271 ± 0.00013	0.0277 ± 0.0043		81.4 ± 0.9	83.4 ± 0.8	106.47
n2462-6	210	110	2.74491	0.54	1.91	0.013325 ± 0.000098	0.0508 ± 0.0015		0.013071 ± 0.000096	0.0355 ± 0.0029		83.7 ± 0.6	85.0 ± 0.6	113.321
n2462-7	270	170	3.5559	0.64	2.13	0.01346 ± 0.00010	0.0483 ± 0.0010		0.01317 ± 0.00010	0.0312 ± 0.0032		84.4 ± 0.6	86.1 ± 0.6	108.816
n2462-8r	230	110	3.0153	0.46	0.64	0.01319 ± 0.00010	0.0471 ± 0.0015		0.01311 ± 0.00010	0.0420 ± 0.0019		83.9 ± 0.7	84.5 ± 0.7	138.163
n2462-8c	590	800	7.80924	1.3	0.12	0.013236 ± 0.000097	0.04691 ± 0.00070		0.013236 ± 0.000097	0.04691 ± 0.00070		84.8 ± 0.6	84.8 ± 0.6	89.8932
n2462-9	150	110	1.9566	0.71	0.86	0.013157 ± 0.000096	0.0484 ± 0.0014		0.013044 ± 0.000096	0.0415 ± 0.0022		83.5 ± 0.6	84.2 ± 0.6	133.607
n2462-10	240	250	3.1152	1	0.66	0.01307 ± 0.00012	0.0478 ± 0.0011		0.01298 ± 0.00012	0.0426 ± 0.0018		83.1 ± 0.8	83.7 ± 0.8	144.969
Loc. 13, P95-W-38, Rumilet Bay Pluton
W38-1	191.876	155.046	2.2	0.834937	2.95	0.01328 ± 0.00041	0.0711 ± 0.0078		0.01350 ± 0.00042	0.0834 ± 0.0091		86.5 ± 2.7	82.6 ± 2.7	1378.25
W38-2	303.971	281.471	3.5	0.956785	-0.446053	0.01348 ± 0.00038	0.0442 ± 0.0034		0.01349 ± 0.00038	0.0452 ± 0.0059		86.4 ± 2.4	86.6 ± 2.4	-151.093
W38-3	805.908	1048.6	9	1.34443	-0.0270818	0.01299 ± 0.00031	0.0475 ± 0.0021		0.01303 ± 0.00031	0.051 ± 0.012		83.4 ± 2.0	83.1 ±2.0	160.37
W38-4	538.628	547.696	6.1	1.05066	-0.414966	0.01318 ± 0.00034	0.0444 ± 0.0025		0.01314 ± 0.00034	0.0424 ± 0.0063		84.2 ± 2.1	84.7 ± 2.2	-338.282
W38-5	197.152	142.323	2.2	0.745909	1.13	0.01306 ± 0.00042	0.0566 ± 0.0052		0.01308 ± 0.00042	0.0580 ± 0.0064		83.8 ± 2.7	82.7 ± 2.7	532.885
W38-6	378.905	320.651	4.2	0.874408	-0.639756	0.01285 ± 0.00035	0.0426 ± 0.0030		0.01287 ± 0.00035	0.0433 ± 0.0061		82.4 ± 2.2	82.9 ± 2.3	-281.945
W38-7	394.371	414.412	4.4	1.08578	0.528852	0.01300 ± 0.00035	0.0519 ± 0.0033		0.01301 ± 0.00035	0.0527 ± 0.0084		83.3 ± 2.2	82.8 ± 2.2	277.049
W38-8	487.786	450.412	5.7	0.9541	0.232335	0.01351 ± 0.00035	0.0496 ± 0.0029		0.01361 ± 0.00035	0.0550 ± 0.0104		87.2 ± 2.3	86.4 ± 2.3	377.06
W38-9	888.756	860.252	9.9	1.00013	0.354368	0.01295 ± 0.00032	0.0505 ± 0.0024		0.01302 ± 0.00032	0.0540 ± 0.0123		83.4 ± 2.1	82.7 ± 2.1	345.011
W38-10	449.323	434.215	5.2	0.998524	0.1931	0.01339 ± 0.00035	0.0493 ± 0.0031		0.01349 ± 0.00035	0.0550 ± 0.0100		86.4 ± 2.3	85.6 ± 2.3	377.867
W38-11	221.226	198.144	2.5	0.92546	0.0572109	0.01319 ± 0.00040	0.0482 ± 0.0047		0.01337 ± 0.00040	0.0587 ± 0.0074		85.6 ± 2.5	84.4 ± 2.5	549.072
W38-12	1424.7	1939.99	17	1.40698	0.0493568	0.01391 ± 0.00032	0.0482 ± 0.0016		0.01392 ± 0.00032	0.0483 ± 0.0142		89.1 ± 2.1	89.1 ± 2.1	30.6045
Loc. 14, P95-Q-36, Tkachen Bay pluton
Q36-1	232.882	108.587	3.82571	0.481788	0.408877	0.01912 ± 0.00052	0.0517 ± 0.0034		0.01928 ± 0.00053	0.0583 ± 0.0033		123 ± 3	122 ± 3	339.288
Q36-2	958.914	719.525	16.0265	0.775317	0.0202472	0.01945 ± 0.00045	0.0487 ± 0.0032		0.01949 ± 0.00045	0.0501 ± 0.0032		124 ± 3	124 ± 3	60.2127
Q36-3	352.224	260.492	5.91968	0.764166	0.129763	0.01956 ± 0.00050	0.0496 ± 0.0030		0.01957 ± 0.00050	0.0500 ± 0.0030		125 ± 3	125 ± 3	55.0107
Q36-4	268.651	188.031	4.23333	0.72319	0.306856	0.01834 ± 0.00050	0.0508 ± 0.0033		0.0185 ± 0.00050	0.0575 ± 0.0033		118 ± 3	117 ± 3	331.037
Q36-5	814.901	587.053	12.9406	0.744364	0.014833	0.01848 ± 0.00044	0.0485 ± 0.0019		0.01838 ± 0.00044	0.0442 ± 0.0027		117 ± 3	118 ± 3	-186.897
Q36-6	419.26	232.792	6.78574	0.573716	0.599197	0.01884 ± 0.00048	0.0532 ± 0.0027		0.01894 ± 0.00048	0.0574 ± 0.0027		121 ± 3	120 ± 3	317.601
Q36-7	323.849	217.084	5.11844	0.692626	-0.342422	0.01840 ± 0.00049	0.0457 ± 0.0030		0.01836 ± 0.00049	0.0442 ± 0.0030		117 ± 3	118 ± 3	-186.706
Q36-8	138.17	72.8115	2.29246	0.544502	0.57435	0.01931 ± 0.00059	0.0530 ± 0.0045		0.01923 ± 0.00059	0.0498 ± 0.0048		123 ± 4	123 ± 4	52.1526
Q36-9	566.213	483.454	9.07407	0.882242	0.0382429	0.01865 ± 0.00046	0.0487 ± 0.0023		0.01859 ± 0.00046	0.04560 ± 0.0030		119 ± 3	119 ± 3	-103.812
Q36-10	277.346	166.173	4.54542	0.619085	0.0708719	0.01908 ± 0.00051	0.0490 ± 0.0030		0.01922 ± 0.00052	0.0548 ± 0.0030		123 ± 3	122 ± 3	229.131
Q36-11 *	1055.03	477.036	18.7281	0.467195	-0.0280207	0.02066 ± 0.00048	0.0484 ± 0.0015		0.02063 ± 0.00048	0.0473 ± 0.0016		132 ± 3	132 ± 3	-52.1107
Q36-12	379.483	219.15	6.06752	0.596709	-0.0334642	0.01861 ± 0.00048	0.0481 ± 0.0027		0.01872 ± 0.00048	0.0528 ± 0.0027		120 ± 3	119 ± 3	168.392
Loc. 15, P95-S-39, Provideniya pluton
S39-1	807.72	559.679	9.77783	0.715964	0.117797	0.01409 ± 0.00034	0.0487 ± 0.0020		0.01414 ± 0.00034	0.0514 ± 0.0020		90.5 ± 2.2	90.1 ± 2	185
S39-2	416.261	209.913	5.17679	0.521057	0.430612	0.01448 ± 0.00038	0.0513 ± 0.0030		0.01449 ± 0.00038	0.0520 ± 0.0031		92.7 ± 2.4	92.3 ± 2.4	206.818
S39-3	718.269	437.922	10.4402	0.629974	12.8026	0.01692 ± 0.00053	0.1495 ± 0.0081		0.01489 ± 0.00082	nd		95.3 ± 5.2	94.4 ± 3.2	-2865.46
S39-4	398.72	156.302	4.90699	0.405051	0.0521561	0.01433 ± 0.00038	0.0483 ± 0.0031		0.01444 ± 0.00039	0.0546 ± 0.0031		92.4 ± 2.5	91.6 ± 2.5	329.176
S39-5	599.724	242.442	7.22916	0.417705	0.189121	0.01403 ± 0.00035	0.0493 ± 0.0025		0.01410 ± 0.00036	0.0533 ± 0.0025		90.3 ± 2.3	89.7 ± 2.3	280.143
S39-6	453.62	205.074	5.75449	0.467124	0.111074	0.01477 ± 0.00038	0.0488 ± 0.0027		0.01474 ± 0.00038	0.0476 ± 0.0028		94.4 ± 2.4	94.4 ± 2.4	-17.307
S39-7	560.306	251.595	7.42193	0.463969	0.404719	0.01542 ± 0.00039	0.0512 ± 0.0025		0.01549 ± 0.00039	0.0549 ± 0.0025		99.1 ± 2.5	98.2 ± 2.5	309.927
S39-8	395.716	155.736	5.15988	0.406646	0.164136	0.01518 ± 0.00040	0.0493 ± 0.0029		0.01516 ± 0.00040	0.0482 ± 0.0030		97.0 ± 2.5	96.9 ± 2.6	11.0824
S39-9	584.895	277.426	7.52792	0.490096	0.0921253	0.01498 ± 0.00038	0.0487 ± 0.0024		0.01506 ± 0.00038	0.0526 ± 0.0024		96.3 ± 2.4	95.8 ± 2.4	221.341
S39-10	577.361	259.888	7.39204	0.465106	-0.358902	0.01490 ± 0.00037	0.0451 ± 0.0023		0.01497 ± 0.00038	0.0489 ± 0.0023		95.8 ± 2.4	95.7 ± 2.4	47.9411
S39-11	832	423.744	10.4331	0.526251	0.970595	0.01460 ± 0.00035	0.0556 ± 0.0030		0.01449 ± 0.00035	0.0498 ± 0.004		92.7 ± 2.2	92.5 ± 2.2	100.043
S39-12	629.234	325.806	7.95671	0.535007	-0.607743	0.01472 ± 0.00037	0.0431 ± 0.0024		0.01479 ± 0.00037	0.0471 ± 0.0023		94.7 ± 2.4	94.8 ± 2.4	-40.7705
Notes:	nd, no data results when common Pb is significantly high.
	(1) radiogenic 206Pb.
	(2) f206 is the percentage of common Pb estimated from 204Pb counts and assuming Stacey & Kramers common Pb cmposition.
	(3) Ratios after subtraction of common Pb (if detected).
	(4) 1σ error
	(5) Age based on projecting a line in inverse concordia space from assumed common Pb through the total (uncorrected) ratios onto concordia (Ludwig, 2001).
	(6) Normal discordance in %; positive values indicate reverse discordance.
	* = excluded from final synthesis (refer to text for motivation).
